# Supplementary material for: Maternal Dietary Patterns and Risk of Postpartum Depression: A Systematic Review
Source: PubMed Central journal article supplement (PMC10618401; doi:10.1007/s10995-023-03781-7), 2023-10-09
Supplement: 10995_2023_3781_MOESM1_ESM.pdf [file 10995_2023_3781_MOESM1_ESM.pdf]

## **Supplemental Table 1: Database-specific search strategy and terms**

### ***PubMed search terms:***

((((((((((((((((nutrit\*[tiab]) OR diet[tiab]) OR diets [tiab]) OR dieting [tiab]) OR dietary[tiab]) OR dietitian[tiab]) OR dietician[tiab]) OR food\*[tiab]) OR dietetic\*[tiab]) OR nutrient\*[tiab]) OR "Diet"[Mesh]) OR "Dietetics"[Mesh]) OR "Nutrients"[Mesh]) OR "Food"[Mesh])) AND (((((((((((((pregnan\*[tiab]) OR gestation\*[tiab]) OR gravidity\*[tiab]) OR trimester\*[tiab]) OR antenatal[tiab]) OR ante-natal[tiab]) OR "ante natal"[tiab]) OR prenatal[tiab]) OR pre-natal[tiab]) OR "pre natal"[tiab]) OR "Pregnant Women"[Mesh]) OR "Pregnancy Trimesters"[Mesh]) OR "Pregnancy"[Mesh])) AND (((((((postpartum[tiab] OR post-partum[tiab] OR "post partum"[tiab] OR postnatal[tiab] OR post-natal[tiab] OR "post natal"[tiab] OR puerperium[tiab])) OR "Postpartum Period"[Mesh:NoExp])) AND (((depress\*[tiab]) OR "Depression"[Mesh]) OR "Depressive Disorder"[Mesh:NoExp])))) OR "Depression, Postpartum"[Mesh])

### ***Embase search terms:***

('postnatal depression'/exp OR (('puerperium'/exp OR postnatal:ab,ti OR 'post natal':ab,ti OR postpartum:ab,ti OR 'post partum':ab,ti OR puerperium:ab,ti) AND ('depression'/exp OR depress\*:ab,ti))) AND ('diet'/exp OR 'dietetics education'/exp OR 'nutrient'/exp OR 'food'/exp OR nutrit\*:ab,ti OR diet:ab,ti OR diets:ab,ti OR dieting:ab,ti OR dietary:ab,ti OR dietitian:ab,ti OR dietician:ab,ti OR food\*:ab,ti OR dietetic\*:ab,ti OR nutrient\*:ab,ti) AND ('pregnancy'/exp OR 'pregnant woman'/exp OR pregnan\*:ab,ti OR gestation\*:ab,ti OR gravidity\*:ab,ti OR trimester\*:ab,ti OR antenatal:ab,ti OR 'ante natal':ab,ti OR prenatal:ab,ti OR 'pre natal':ab,ti)

### ***Scopus search terms:***

TITLE-ABS (pregnan\* OR gestation\* OR gravidity\* OR trimester\* OR antenatal OR "ante-natal" OR "ante natal" OR prenatal OR "pre-natal" OR "pre natal")) AND (TITLE-ABS(nutrit\* OR diet OR diets OR dieting OR dietary OR dietition OR dietician OR food\* OR dietetics OR dietetic OR nutrient\*)) AND (TITLE-ABS("post partum" OR "post-partum" OR postpartum OR "post natal" OR "post-natal" OR postnatal OR puerperium) AND TITLE-ABS(depress\*))

***CINAHL search terms:***

(MH "Pregnancy Trimesters+") OR (MH "Pregnancy+") OR (MH "Expectant Mothers") OR TI ( pregnan\* OR gestation\* OR gravidity\* OR trimester\* OR antenatal OR "ante natal" OR ante-natal OR prenatal OR "pre natal" OR pre-natal) OR AB ( pregnan\* OR gestation\* OR gravidity\* OR trimester\* OR antenatal OR "ante natal" OR ante-natal OR prenatal OR "pre natal" OR pre-natal ) AND (MH "Diet+") OR (MH "Nutritional Requirements+") OR (MH "Dietetics") OR (MH "Research, Dietetics") OR (MH "Food+") OR (MH "Nutrients+") OR TI ( nutrit\* OR diet OR diets OR dieting OR dietary OR dietitian\* OR dietician\* OR food\* OR dietetic OR dietetics OR nutrient\* ) OR AB ( nutrit\* OR diet OR diets OR dieting OR dietary OR dietitian\* OR dietician\* OR food\* OR dietetic OR dietetics OR nutrient\* ) AND (MH "Depression, Postpartum") OR (MH "Postnatal Period") OR TI ( postnatal OR postpartum OR "post natal" OR "post partum" OR "post-natal" OR "post-partum" OR puerperium ) OR AB ( postnatal OR postpartum OR "post natal" OR "post partum" OR "post-natal" OR "post-partum" OR puerperium ) OR (MH "Depression") OR TI depress\* OR AB depress\*

***PsycInfo search terms:***

(((((IndexTermsFilt: ("Diets")) OR ((IndexTermsFilt: ("Food"))))) OR (((abstract: (nutrit\*)) OR ((abstract: (diet))) OR ((abstract: (diets))) OR ((abstract: (dieting))) OR ((abstract: (dietary))) OR ((abstract: (dietitian))) OR ((abstract: (dietician))) OR ((abstract: (food\*))) OR ((abstract: (dietetic))) OR ((abstract: (dietetics))) OR ((abstract: (nutrient\*))) OR (((title: (nutrit\*)) OR ((title: (diet))) OR ((title: (diets))) OR ((title: (dieting))) OR ((title: (dietary))) OR ((title: (dietitian))) OR ((title: (dietician))) OR ((title: (food\*))) OR ((title: (dietetic))) OR ((title: (dietetics))) OR ((title: (nutrient\*)))))) AND (((abstract: (pregnan\*)) OR ((abstract: (gestation\*)) OR ((abstract: (gravity\*))) OR ((abstract: (trimester\*))) OR ((abstract: (antenatal))) OR ((abstract: ("ante-natal"))) OR ((abstract: ("ante natal"))) OR ((abstract: (prenatal))) OR ((abstract: ("pre-natal"))) OR ((abstract: ("pre natal"))) OR (((title: (pregnan\*)) OR ((title: (gestation\*)) OR ((title: (gravity\*))) OR ((title: (trimester\*))) OR ((title: (antenatal))) OR ((title: ("ante-natal"))) OR ((title: ("ante natal"))) OR ((title: (prenatal))) OR ((title: ("pre-natal"))) OR ((title: ("pre natal"))))) OR (((IndexTermsFilt: ("Pregnancy")))) AND (((((((abstract: (depress\*)) OR (((title: (depress\*)))) OR (((IndexTermsFilt: ("Major Depression")))) OR (((IndexTermsFilt: ("Depression (Emotion)")))) AND (((abstract: (postnatal))) OR ((abstract: ("post natal"))) OR ((abstract: ("post-natal"))) OR ((abstract: (postpartum))) OR ((abstract: ("post-partum"))) OR ((abstract: ("post partum"))) OR ((abstract: (puerperium)))) OR (((title: (postnatal))) OR ((title: ("post natal"))) OR ((title: ("post-natal"))) OR ((title: (postpartum))) OR ((title: ("post-partum"))) OR ((title: ("post partum"))) OR ((title: (puerperium)))) OR (((IndexTermsFilt: ("Postnatal Period")))) OR (((IndexTermsFilt: ("Postpartum Depression")))) OR Any Field: ((((((IndexTermsFilt: ("Diets")) OR ((IndexTermsFilt: ("Food"))))) OR (((abstract: (nutrit\*)) OR ((abstract: (diet))) OR ((abstract: (diets))) OR ((abstract: (dieting))) OR ((abstract: (dietary))) OR ((abstract: (dietitian))) OR ((abstract: (dietician))) OR ((abstract: (food\*))) OR ((abstract: (dietetic))) OR ((abstract: (dietetics))) OR ((abstract: (nutrient\*))) OR (((title: (nutrit\*)) OR ((title: (diet))) OR ((title: (diets))) OR ((title: (dieting))) OR ((title: (dietary))) OR ((title: (dietitian))) OR

((title: (dietician)) OR ((title: (food\*))) OR ((title: (dietetic))) OR ((title: (dietetics))) OR ((title: (nutrient\*)))) AND (((abstract: (pregnan\*))) OR ((abstract: (gestation\*))) OR ((abstract: (gravidity\*))) OR ((abstract: (trimester\*))) OR ((abstract: (antenatal))) OR ((abstract: (“ante-natal”))) OR ((abstract: ("ante natal"))) OR ((abstract: (prenatal))) OR ((abstract: (“pre-natal”))) OR ((abstract: ("pre natal"))) OR ((title: (pregnan\*))) OR ((title: (gestation\*))) OR ((title: (gravidity\*))) OR ((title: (trimester\*))) OR ((title: (antenatal))) OR ((title: (“ante-natal”))) OR ((title: ("ante natal"))) OR ((title: (prenatal))) OR ((title: (“pre-natal”))) OR ((title: ("pre natal")))) OR (((IndexTermsFilt: ("Pregnancy")))) AND (((((((abstract: (depress\*))) OR (((title: (depress\*)))) OR (((IndexTermsFilt: ("Major Depression")))) OR (((IndexTermsFilt: ("Depression (Emotion)")))))) AND (((abstract: (postnatal))) OR ((abstract: ("post natal"))) OR ((abstract: (“post-natal”))) OR ((abstract: (postpartum))) OR ((abstract: (“post-partum”))) OR ((abstract: ("post partum"))) OR ((abstract: (puerperium)))) OR (((title: (postnatal))) OR ((title: ("post natal"))) OR ((title: (“post-natal”))) OR ((title: (postpartum))) OR ((title: (“post-partum”))) OR ((title: ("post partum"))) OR ((title: (puerperium)))) OR (((IndexTermsFilt: ("Postnatal Period")))) OR (((IndexTermsFilt: ("Postpartum Depression"))))
